# Supplementary material for: Activation of σ20-dependent recombination and horizontal gene transfer in Mycoplasma genitalium
Source: PubMed Central journal article supplement — DNA Res. 2018 Apr 11;25(4):383–93. doi: 10.1093/dnares/dsy011 (PMC6105099; doi:10.1093/dnares/dsy011), 2018-04-11
Supplement: dsy011_supp_figure_s1.pdf [file dsy011_supp_figure_s1.pdf]

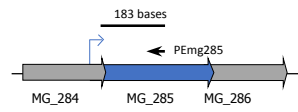

**MG\_28**

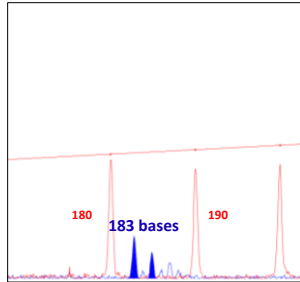

TSS identified at base  
347199

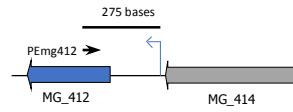

**MG\_412**

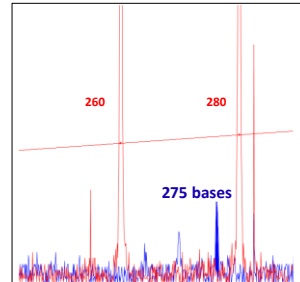

TSS identified at base  
516175

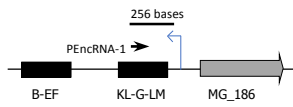

**ncRNA-1**

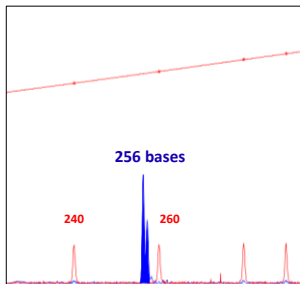

TSS identified at base  
215910

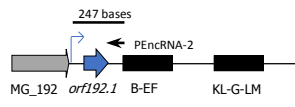

**ncRNA-2**

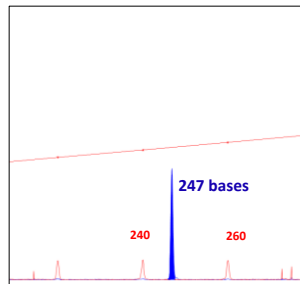

TSS identified at base  
229163

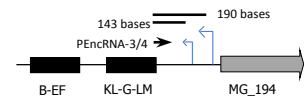

**ncRNA-3/4**

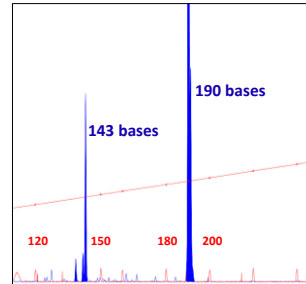

TSS identified at bases  
231822 and 231869
