# Supplementary material for: Activation of σ20-dependent recombination and horizontal gene transfer in Mycoplasma genitalium
Source: PubMed Central journal article supplement — DNA Res. 2018 Apr 11;25(4):383–93. doi: 10.1093/dnares/dsy011 (PMC6105099; doi:10.1093/dnares/dsy011), 2018-04-11

RecA:Ch  $\Delta rrlB$   
 $\bar{T}nrrlB$

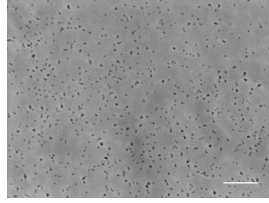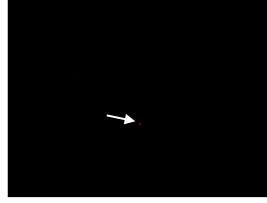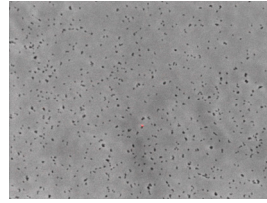

$\sigma^{20}$ :Ch  $\Delta rrlB$   
 $\bar{T}nrrlB$

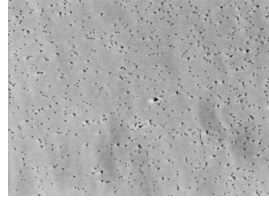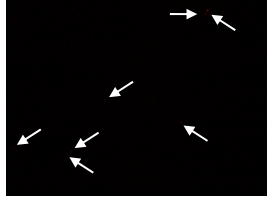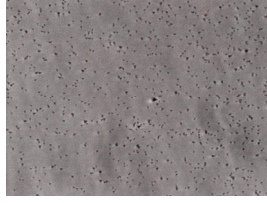

RecA:Ch  $\Delta rrlB$

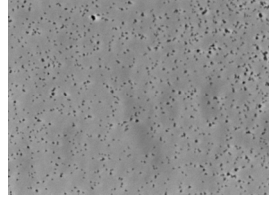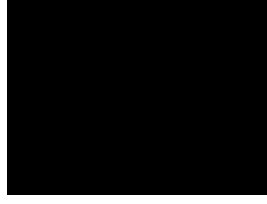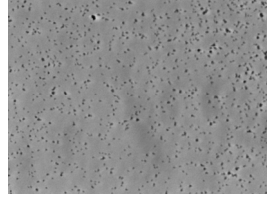

$\sigma^{20}$ :Ch  $\Delta rrlB$

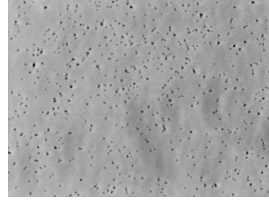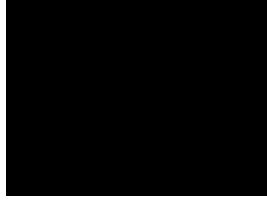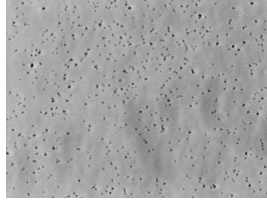

Supplement: dsy011_supp_figure_s4.pdf [file dsy011_supp_figure_s4.pdf]
