# Supplementary material for: Activation of σ20-dependent recombination and horizontal gene transfer in Mycoplasma genitalium
Source: PubMed Central journal article supplement — DNA Res. 2018 Apr 11;25(4):383–93. doi: 10.1093/dnares/dsy011 (PMC6105099; doi:10.1093/dnares/dsy011), 2018-04-11
Supplement: dsy011_supplementary_information.pdf [file dsy011_supplementary_information.pdf]

## 1 **Construction of *M. genitalium* mutants**

2 **RrlA:Ch.** This strain bears a fusion of the *rrlA* gene to the mCherry marker at its native locus. It was  
3 obtained by homologous recombination (HR) using the pRrlA:Ch plasmid. To generate this plasmid,  
4 1kb fragment containing the MG\_220 ORF without the stop codon was PCR-amplified with the  
5 mg220 Up-F and mg220:Ch (Up-R) primers. In parallel, a 1 kb PCR fragment encompassing the  
6 MG\_220 downstream region (DR) was PCR-amplified with the mg220:Ch (Down-F) and mg220  
7 (Down-R) primers. The *cat* marker (687 bp) was PCR-amplified from plasmid pMTn*Cat* with the  
8 Cherry:cat-F and cat-R primers, and the mCherry coding region (711 bp) was PCR-amplified from  
9 plasmid pmCherry (Clontech-Takara) with the Cherry-F and Cherry-R primers. Then, the *cat* marker  
10 and the mCherry PCR product were joined by Splicing by Overlap Extension – PCR (SOE-PCR) with  
11 the Cherry-F and cat-R primers. The resulting recombinant amplicon and the 1kb PCR fragment  
12 containing the MG\_220 ORF were also joined by SOE-PCR with the mg220 (Up-F) and cat-R primers.  
13 Finally, the obtained 2.4kb PCR product and the 1kb PCR fragment encompassing the MG\_220 DR  
14 were joined by SOE-PCR with the mg220 Up-F and mg220 Down-R primers. The final PCR product  
15 (3.4kb) was cloned into a EcoRV-digested pBE<sup>1</sup> to create pRrlA:Ch.

16

17 **RrlB:Ch.** This strain bears a fusion of the *rrlB* gene to the mCherry marker at its native locus. It was  
18 obtained by HR using the pRrlB:Ch plasmid. To generate this plasmid, 1kb fragment containing the  
19 *rrlB* ORF without the stop codon was PCR-amplified with the mpn534h (Up-F) and mpn534h:Ch (Up-  
20 R) primers. In parallel, a 1 kb PCR fragment encompassing the *rrlB* DR was PCR-amplified with the  
21 mpn534h:Ch (Down-F) and mpn534h (Down-R) primers. The *cat* marker (687bp) and the mCherry  
22 coding region (711bp) was PCR-amplified and joined together using SOE-PCR as described in the  
23 construction of the RrlA:Ch strain. The resulting recombinant amplicon and the 1kb PCR fragment  
24 containing the *rrlB* ORF were also joined by SOE-PCR with the mpn534h (Up-F) and cat-R primers.  
25 Finally, the obtained 2.4kb PCR product and the 1kb PCR fragment encompassing the *rrlB* DR were  
26 joined by SOE-PCR with the mpn534h (Up-F) and mpn534h (Down-R) primers. The final PCR  
27 product (3.4kb) was cloned into a EcoRV-digested pBE<sup>1</sup> to create pRrlB:Ch.

28

29 **ORF192.1:Ch.** This strain bears a fusion of the *orf192.1* gene to the mCherry marker at its native  
30 locus. It was obtained by HR using the pORF192.1:Ch plasmid. To generate this plasmid, 1kb  
31 fragment containing the ORF192.1 without the stop codon was PCR-amplified with the orf192.1 (Up-  
32 F) and orf192.1:Ch (Up-R) primers. In parallel, a 1 kb PCR fragment encompassing the *orf192.1* DR  
33 was PCR-amplified with the orf192.1:Ch (Down-F) and orf192.1 (Down-R) primers. The *cat* marker  
34 (687 bp) and the mCherry coding region (711bp) was PCR-amplified and joined together using SOE-  
35 PCR as described in the construction of the RrlA:Ch strain. The resulting recombinant amplicon and  
36 the 1kb PCR fragment containing the *orf192.1* were also joined by SOE-PCR with the orf192.1 (Up-  
37 F) and cat-R primers. Finally, the obtained 2.4kb PCR product and the 1kb PCR fragment  
38 encompassing the *orf192.1* DR were joined by SOE-PCR with the orf192.1 (Up-F) and orf192.1

39 (Down-R) primers. The final PCR product (3.4kb) was cloned into a EcoRV-digested pBE (1) to create  
40 pORF192.1:Ch.

41

42 **MG427:Ch.** This strain bears a fusion of the MG\_427 gene to the mCherry marker at its native locus.  
43 It was obtained by HR using the pMG427:Ch plasmid. To generate this plasmid, 1kb fragment  
44 containing the MG\_427 ORF without the stop codon was PCR-amplified with the mg428 (Up-F) and  
45 mg427:Ch (Up-R) primers. In parallel, a 1 kb PCR fragment encompassing the MG\_427 DR was PCR-  
46 amplified with the mg427:Ch (Down-F) and mg427 (Down-R) primers. The *cat* marker (687 bp) and  
47 the mCherry coding region (711bp) was PCR-amplified and joined together using SOE-PCR as  
48 described in the construction of the RrlA:Ch strain. The resulting recombinant amplicon and the 1kb  
49 PCR fragment containing the MG\_427 ORF were also joined by SOE-PCR with the mg428 (Up-F)  
50 and cat-R primers. Finally, the obtained 2.4kb PCR product and the 1kb PCR fragment encompassing  
51 the MG\_427 DR were joined by SOE-PCR with the mg428 (Up-F) and mg427:Ch (Down-R) primers.  
52 The final PCR product (3.4kb) was cloned into a EcoRV-digested pBE (1) to create pMG427:Ch.

53

54 **RrlA:Ch ΔMG\_428 and RrlB:Ch ΔMG\_428.** These strains were generated by HR using the  
55 pΔMG\_428 plasmid <sup>2</sup>.

56

57 **RrlA:Ch ΔMG\_428 Tnσ<sup>20</sup> and RrlA:Ch ΔMG\_428 Tnσ<sup>20</sup>.** These strains carry the pTnPacMG\_428  
58 plasmid that overexpresses σ<sup>20</sup>. This plasmid was obtained by replacing the *cat* marker from the  
59 pTnCatMG\_428 plasmid (2) by the *pac* cassette.

60

61 **σ<sup>20</sup>:Ch ΔrrlA and RecA:Ch ΔrrlA.** These strains were obtained by HR using the pΔMG\_220 plasmid  
62 (2).

63

64 **σ<sup>20</sup>:Ch ΔrrlB and RecA:Ch ΔrrlB.** These strains were obtained by HR using the pΔMG\_RS02200  
65 plasmid (2).

66

67 **RecA:Ch ΔMG\_390 and RecA:Ch ΔMG\_414.** These strains were obtained by HR using the  
68 pΔMG\_390 and pΔMG\_414 plasmids (2), respectively.

69

70 **σ<sup>20</sup>:Ch ΔrrlA TnrrlA and RecA:Ch ΔrrlA TnrrlA.** These strains were generated using the  
71 minitransposon TnPacMG\_220. The MG\_220 allele was PCR-amplified with the COMmg220-F and  
72 COMmg220-R primers, digested with *ApaI* and *XhoI* and ligated into a similarly digested pMTnPac  
73 plasmid.

74

75 **σ<sup>20</sup>:Ch ΔrrlB TnrrlB and RecA:Ch ΔrrlB TnrrlB.** These strains were generated using the  
76 minitransposon TnPacMG\_RS02200. The MG\_RS02200 allele was PCR-amplified with the

77 COMmpn534h-F and COMmpn534h-R primers, digested with *Apa*I and *Xho*I and ligated into a  
78 similarly digested pMTn*Pac* plasmid.

79

80  **$\sigma^{20}$ :Ch Tn $\sigma^{20}$ :YFP.** This strain was generated using the minitransposon Tn*Pac*MG\_428:yfp. The  
81 MG\_428 allele under the control of the P<sub>MG\_438</sub> promoter was PCR-amplified with the COMmg428-F  
82 P438 and mg428:Ch (Up-R) primers, while eYFP was amplified using Cherry-F and YFP-R primers  
83 from pCAG-eYFP plasmid (Addgene). Then, both fragments were joined in a SOE-PCR using  
84 COMmg428-F P438 and YFP-R, digested with *Apa*I and *Xho*I and ligated into a similarly digested  
85 pMTn*Pac* plasmid. A mutant carrying the transposon within the MG\_343 gene was selected for further  
86 analysis.

87

88 **G37 Tn $\sigma^{20}$ :YFP and RecA:Ch Tn $\sigma^{20}$ :YFP.** To generate these strains we moved the transposon  
89 inserted within the MG\_343 gene from the  $\sigma^{20}$ :Ch Tn $\sigma^{20}$ :YFP strain by HR using the pMG428:eYFP  
90 plasmid. To construct this plasmid we amplified the chromosomal region carrying the  
91 Tn*Pac*MG\_428:yfp transposon using the MG\_343-F and MG\_343-R primers. The resulting PCR  
92 product (~3.4 kb) was cloned into an EcoRV-digested pBE (1) plasmid.

93

94 **RecA:Ch Tn $\sigma^{20}$ :YFP  $\Delta$ *rriA* and RecA:Ch Tn $\sigma^{20}$ :YFP  $\Delta$ *rriB*.** These strains were obtained by HR  
95 using the p $\Delta$ MG\_220 and p $\Delta$ MG\_RS02200 plasmids (2), respectively.

96

97 **RecA:Ch Tn $\sigma^{20}$ :YFP Tn*rriA* and RecA:Ch Tn $\sigma^{20}$ :YFP Tn*rriB*.** These strains were created using  
98 the minitransposons pTn*Tet*MMG\_220 and pTn*Tet*MMG\_RS02200, respectively. These  
99 minitransposons were generated by replacing the *pac* marker from the pTn*Pac*MG\_220 and  
100 pTn*Pac*MG\_RS02200 (described above) by the *tetM* marker.

101

102  **$\Delta$ *recA*.** This strain carries a deletion of the MG\_339 gene (*recA*). It was obtained by HR using the  
103 p $\Delta$ *recA* plasmid. To generate this plasmid, the MG\_339 upstream region (UR) was PCR-amplified  
104 with the RecA (Up-F) and RecA (Up-R) primers. Similarly, the MG\_339 DR was PCR-amplified with  
105 the RecA (Down-F) and RecA (Down-R) primers. In parallel, the *tetM* selectable marker was PCR-  
106 amplified with the Tc-F and Tc-R primers (2). Then, the MG\_339 UR and *tetM* amplicons were joined  
107 by SOE-PCR with the RecA (Up-F) and Tc-F primers. Next, the obtained recombinant amplicon and  
108 the MG\_339 DR were joined by SOE-PCR with the RecA (Up-F) and RecA (Down-R) primers.  
109 Finally, the resulting PCR product (~4 kb) was cloned into an EcoRV-digested pBE (1) plasmid.

110

111  **$\Delta$ *rriA* Tn $\sigma^{20}$ ,  $\Delta$ *rriB* Tn $\sigma^{20}$  and  $\Delta$ *recA* Tn $\sigma^{20}$ .** These strains carry the pTn*Cat*MG\_428 plasmid that  
112 overexpresses  $\sigma^{20}$  (2).

113

114 **P110-WT.** This strain was obtained by the introduction of the *TnPacP110-WT* transposon into the  
115  $\Delta$ MG<sub>192</sub> mutant <sup>3</sup>. We constructed the p*TnPacP110-WT* plasmid using the COMmg192-F and  
116 COMmg192-R primers. Then, the amplicon was digested with *ApaI/XhoI* restriction enzymes and  
117 ligated to a similarly digested pMT*Pac*. This strain was used as the recipient for the mating  
118 experiments.

119

120

121 **SUPPLEMENTARY FIGURE LEGENDS**

122 **Figure S1. Determination of the TSSs of novel genes under the control of  $\sigma^{20}$ .** Primer extension  
123 analysis of the MG\_285, MG\_412 and the non-coding regions ncRNA-1, ncRNA-2 and ncRNA-3/4.  
124 All electropherograms were generated with Peak Scanner v1.0 (Applied Biosystems) analysis  
125 software. Red peaks represent ROX size standards while blue peaks correspond to the primer extension  
126 products. Schematic representations of the genome regions analyzed are shown and the presence of  
127 the identified promoters indicated with blue arrows. The approximate location of the primers used in  
128 these analyses is also indicated by arrows.

129 **Figure S2. Comparative analysis of the ORF192.1 of *M. genitalium* and the MPN143 gene of *M.***  
130 ***pneumoniae*.** (A) Analysis of the chromosomal location of *orf192.1* and MPN143 in *M. genitalium*  
131 and *M. pneumoniae*, respectively. Purple arrows represent ncRNAs identified in both strains. (B)  
132 Sequence alignment of the ORF192.1 and MPN143 proteins. (C) Sequence alignment of the upstream  
133 regions of the *orf192.1* and MPN143 genes. The predicted -35 and -10 elements of putative  $\sigma^{20}$   
134 promoters are boxed.

135 **Figure S3. Single cell analysis of RrlA and MG427 expression in different mutant backgrounds.**  
136 Each row contains a series of three fluorescence microscopy images corresponding to the phase  
137 contrast, the TRITC channel and the resulting overlay of the different mutants analyzed. Scale bar is  
138 10  $\mu\text{m}$ .

139 **Figure S4. Single cell analysis of  $\sigma^{20}$  and RecA expression in different mutant backgrounds.** Each  
140 row contains a series of three fluorescence microscopy images corresponding to the phase contrast,  
141 the TRITC channel and the resulting overlay of the different mutants analyzed. White arrows indicate  
142 the presence of mCherry fluorescent cells in strains where fluorescence is rare. Scale bar is 10  $\mu\text{m}$ .

143 **Figure S5. Single cell analysis RecA and  $\sigma^{20}$  expression upon the overexpression of RrlA or RrlB.**  
144 Each row contains a series of four fluorescence microscopy images corresponding to the phase  
145 contrast, the TRITC channel, the eYFP channel and the resulting overlay of the different mutants  
146 analyzed. Yellow arrows point to cells showing an intense YFP fluorescence. Red arrows point to  
147 mCherry fluorescent cells that show also intense YFP fluorescence. Scale bar is 10  $\mu\text{m}$ .

148 **Figure S6. PCR analysis of the transconjugant strains.** Analysis of representative transconjugant  
149 strains by PCR to verify the transfer of the antibiotic markers. Arrows indicate the presence of  
150 amplicons compatible with the presence of the antibiotic markers in the genome. The presence of the  
151 *tetM*, *cat* and *pac* antibiotic markers was assessed using the SCRmg428-F/R, mg281-F/R and SCRpac-  
152 F/R primers, respectively.

153

154 **References**

- 155 1. Pich, O. Q., Burgos, R., Planell, R., Querol, E., and Piñol, J. 2006, Comparative analysis of  
156 antibiotic resistance gene markers in *Mycoplasma genitalium*: application to studies of the  
157 minimal gene complement. *Microbiology*, **152**, 519–27.
- 158 2. Torres-Puig, S., Broto, A., Querol, E., Piñol, J., and Pich, O. Q. 2015, A novel sigma factor  
159 reveals a unique regulon controlling cell-specific recombination in *Mycoplasma genitalium*.  
160 *Nucleic Acids Res.*, **43**, 4923–36.
- 161 3. Burgos, R., Pich, O. Q., Ferrer-Navarro, M., Baseman, J. B., Querol, E., and Pinol, J. 2006,  
162 *Mycoplasma genitalium* P140 and P110 cytoadhesins are reciprocally stabilized and required for  
163 cell adhesion and terminal-organelle development. *J. Bacteriol.*, **188**, 8627–37.

164
