# Supplementary material for: Activation of σ20-dependent recombination and horizontal gene transfer in Mycoplasma genitalium
Source: PubMed Central journal article supplement — DNA Res. 2018 Apr 11;25(4):383–93. doi: 10.1093/dnares/dsy011 (PMC6105099; doi:10.1093/dnares/dsy011), 2018-04-11
Supplement: dsy011_table_s1.pdf [file dsy011_table_s1.pdf]

**Table S1.** Strains used in this study

| Strain Name                                 | Genotype                                                                                | Reference                        |
|---------------------------------------------|-----------------------------------------------------------------------------------------|----------------------------------|
| G37                                         | Wild-type                                                                               | ATCC 33530                       |
| $\sigma^{20}$ :Ch                           | <i>cat</i> , MG_428:mcherry                                                             | Torres-Puig <i>et al.</i> , 2015 |
| RecA:Ch                                     | <i>cat</i> , MG_339:mcherry                                                             | Torres-Puig <i>et al.</i> , 2015 |
| RrlA:Ch                                     | <i>cat</i> , MG_220:mcherry                                                             | This work                        |
| RrlB:Ch                                     | <i>cat</i> , MG_RS02200:mcherry                                                         | This work                        |
| ORF192.1                                    | <i>cat</i> , <i>orf192.1</i> :mcherry                                                   | This work                        |
| MG427:Ch                                    | <i>cat</i> , MG_427:mcherry                                                             | This work                        |
| RrlA:Ch $\Delta$ MG_428                     | <i>cat</i> , MG_220:mcherry, $\Delta$ MG_428:: <i>tetM</i>                              | This work                        |
| RrlB:Ch $\Delta$ MG_428                     | <i>cat</i> , MG_RS02200:mcherry, $\Delta$ MG_428:: <i>tetM</i>                          | This work                        |
| RrlA:Ch $\Delta$ MG_428 Tn $\sigma^{20}$    | <i>cat</i> , MG_220:mcherry, $\Delta$ MG_428:: <i>tetM</i> , MG_281::TnPacMG_428        | This work                        |
| RrlB:Ch $\Delta$ MG_428 Tn $\sigma^{20}$    | <i>cat</i> , MG_RS02200:mcherry, $\Delta$ MG_428:: <i>tetM</i> , MG_339::TnPacMG_428    | This work                        |
| $\sigma^{20}$ :Ch $\Delta$ rriA             | <i>cat</i> , MG_428:mcherry, $\Delta$ MG_220:: <i>tetM</i>                              | This work                        |
| $\sigma^{20}$ :Ch $\Delta$ rriB             | <i>cat</i> , MG_428:mcherry, $\Delta$ MG_220:: <i>tetM</i>                              | This work                        |
| $\sigma^{20}$ :Ch $\Delta$ rriA TnrriA      | <i>cat</i> , MG_428:mcherry, $\Delta$ MG_220:: <i>tetM</i> , TnPacMG_220                | This work                        |
| $\sigma^{20}$ :Ch $\Delta$ rriB TnrriB      | <i>cat</i> , MG_428:mcherry, $\Delta$ MG_220:: <i>tetM</i> , TnPacMG_RS02200            | This work                        |
| RecA:Ch $\Delta$ rriA                       | <i>cat</i> , MG_339:mcherry, $\Delta$ MG_220:: <i>tetM</i>                              | This work                        |
| RecA:Ch $\Delta$ rriB                       | <i>cat</i> , MG_339:mcherry, $\Delta$ MG_RS02200:: <i>tetM</i>                          | This work                        |
| RecA:Ch $\Delta$ MG_390                     | <i>cat</i> , MG_339:mcherry, $\Delta$ MG_390:: <i>tetM</i>                              | This work                        |
| RecA:Ch $\Delta$ MG_414                     | <i>cat</i> , MG_339:mcherry, $\Delta$ MG_414:: <i>tetM</i>                              | This work                        |
| RecA:Ch $\Delta$ rriA TnrriA                | <i>cat</i> , MG_339:mcherry, $\Delta$ MG_220:: <i>tetM</i> , TnPacMG_220                | This work                        |
| RecA:Ch $\Delta$ rriB TnrriB                | <i>cat</i> , MG_339:mcherry, $\Delta$ MG_RS02200:: <i>tetM</i> , TnPacMG_RS02200        | This work                        |
| G37 Tn $\sigma^{20}$ :YFP                   | MG_343::TnPacMG_428:yfp                                                                 | This work                        |
| $\sigma^{20}$ :Ch Tn $\sigma^{20}$ :YFP     | <i>cat</i> , MG_428:mcherry, MG_343::TnPacMG_428:yfp                                    | This work                        |
| RecA:Ch Tn $\sigma^{20}$ :YFP               | <i>cat</i> , MG_339:mcherry, MG_343::TnPacMG_428:yfp                                    | This work                        |
| RecA:Ch Tn $\sigma^{20}$ :YFP $\Delta$ rriA | <i>cat</i> , MG_339:mcherry, MG_343::TnPacMG_428:yfp, $\Delta$ MG_220:: <i>tetM</i>     | This work                        |
| RecA:Ch Tn $\sigma^{20}$ :YFP $\Delta$ rriB | <i>cat</i> , MG_339:mcherry, MG_343::TnPacMG_428:yfp, $\Delta$ MG_RS02200:: <i>tetM</i> | This work                        |
| RecA:Ch Tn $\sigma^{20}$ :YFP TnrriA        | <i>cat</i> , MG_428:mcherry, MG_343::TnPacMG_428:yfp, Tn <i>TetMMG_220</i>              | This work                        |
| RecA:Ch Tn $\sigma^{20}$ :YFP TnrriB        | <i>cat</i> , MG_428:mcherry, MG_343::TnPacMG_428:yfp, Tn <i>TetMMG_RS02200</i>          | This work                        |
| $\Delta$ MG_428                             | $\Delta$ MG_428:: <i>tetM</i>                                                           | Torres-Puig <i>et al.</i> , 2015 |
| $\Delta$ rriA                               | $\Delta$ MG_220:: <i>tetM</i>                                                           | Torres-Puig <i>et al.</i> , 2015 |
| $\Delta$ rriB                               | $\Delta$ MG_RS02200:: <i>tetM</i>                                                       | Torres-Puig <i>et al.</i> , 2015 |
| $\Delta$ recA                               | $\Delta$ MG_339:: <i>tetM</i>                                                           | This work                        |
| $\Delta$ MG_191                             | $\Delta$ MG_191:: <i>tetM</i>                                                           | Burgos <i>et al.</i> , 2006      |
| $\Delta$ MG_192                             | $\Delta$ MG_192:: <i>tetM</i>                                                           | Burgos <i>et al.</i> , 2006      |
| P110-WT                                     | $\Delta$ MG_192:: <i>tetM</i> , <i>tetM</i> ::TnPacP110-WT                              | This work                        |
| Up $\sigma^{20}$                            | $\Delta$ MG_428:: <i>tetM</i> , MG_281::Tn <i>CatMG_428</i>                             | Torres-Puig <i>et al.</i> , 2015 |
| $\Delta$ rriA Tn $\sigma^{20}$              | $\Delta$ MG_220:: <i>tetM</i> , MG_281::Tn <i>CatMG_428</i>                             | This work                        |
| $\Delta$ rriB Tn $\sigma^{20}$              | $\Delta$ MG_RS002200:: <i>tetM</i> , MG_281::Tn <i>CatMG_428</i>                        | This work                        |
| $\Delta$ recA Tn $\sigma^{20}$              | $\Delta$ MG_339:: <i>tetM</i> , Tn <i>CatMG_428</i> (pool)                              | This work                        |
