# Supplementary material for: Activation of σ20-dependent recombination and horizontal gene transfer in Mycoplasma genitalium
Source: PubMed Central journal article supplement — DNA Res. 2018 Apr 11;25(4):383–93. doi: 10.1093/dnares/dsy011 (PMC6105099; doi:10.1093/dnares/dsy011), 2018-04-11
Supplement: dsy011_table_s2.pdf [file dsy011_table_s2.pdf]

**Table S2.** Primers used in this study

|                          | <b>Primer name (Code)</b>                      | <b>Sequence (5'→3')</b>                                                                          |
|--------------------------|------------------------------------------------|--------------------------------------------------------------------------------------------------|
| Mutants and screening    | RecA (Up-F)                                    | CCACTTTCCTAGGATCTTG                                                                              |
|                          | RecA (Up-R)                                    | GTTC AATAAAATACTTAGGATCCTAACTGTTCAACAATTGGC                                                      |
|                          | RecA (Down-F)                                  | TTTATAATTCTAAATACTACTCGAGGAGCCATCTTTCATTACACC                                                    |
|                          | RecA (Down-R)                                  | CAGTCTAAATTGGTGTAGC                                                                              |
|                          | COMmg220-F                                     | AGTGGGCCCTTAAAAACAAAATCGTTTCTAATTTAAATTTAAGTTAACTTAATCCATAA<br>GCATATATGTATAAATTAGAAAAAGCAC      |
|                          | COMmg220-R                                     | AGTCTCGAGTTAATGATGATGATGATGATGACTAAAACTGAAAGG                                                    |
|                          | COMmpn534h-F                                   | AGTGGGCCCTTAAAAACAAAATCGTTTCTAATTTAAATTTAAGTTAACTTAATCCATAA<br>GCATATATGAAAACATCAGAGAAAC         |
|                          | COMmpn534h-R                                   | AGTCTCGAGTTAATGATGATGATGATGATGTTGTCCTCCATTATTTTTTTG                                              |
|                          | COMmg192-F                                     | AGTGGGCCCTAACAAAAACAAAATAGTGTATGTTAGTGATTGTGTGAAAAAATTG<br>TTTATAATTAAGTTGTATGAAAACAATGAGAAAACAG |
|                          | COMmg192-R                                     | AGTCTCGAGCTAATTTTGGTTTCTTCTG                                                                     |
|                          | MG_343-F                                       | GCATGCTAATGGACTTAATC                                                                             |
|                          | MG_343-R                                       | TCAAAACACAGTAAATGGC                                                                              |
|                          | SCRrecA-F                                      | TGAAC TTTGTGATGAACCAC                                                                            |
|                          | SCRrecA-R                                      | AACTGGTCTCTACAAATTG                                                                              |
|                          | SCRmg220-F                                     | TGATGTTATGGCGGTAGTG                                                                              |
|                          | SCRmg220-R                                     | AGGTCCATTAAGATCCCATC                                                                             |
|                          | SCRmpn534h-F                                   | CGATGTGTTTAGTGATTTGTC                                                                            |
|                          | SCRmpn534h-R                                   | CAAGTTGTGTAGTTGCACCA                                                                             |
|                          | SCRmg343-F                                     | GATTTTTGTGACATTTGTGG                                                                             |
|                          | SCRmg343-R                                     | GAAAACAGCTGAGAAAATG                                                                              |
| SCRmg427-F               | CAATCATAAAGGGACATGTG                           |                                                                                                  |
| SCRmg428-R               | AGTTGAAGATGGCAAAACAG                           |                                                                                                  |
| Single Cell analysis     | mg220(Up-F)                                    | GTGATCCTGATCCAATCCAA                                                                             |
|                          | mg220:Ch (Up-R)                                | GTGGCAGGGCGGGCGTAAGTTAAAAC TACTGTTGTTAACAC                                                       |
|                          | mg220:Ch (Down-F)                              | TCCTCGCCCTTGCTCACCATACTAAAAC TGGAAAGGAATAG                                                       |
|                          | mg220(Down-R)                                  | GTTGTTTAAAGATGAACTGGG                                                                            |
|                          | mpn534h (Up-F)                                 | ATCGCACAAACACTTGCACC                                                                             |
|                          | mpn534h:Ch (Up-R)                              | TCCTCGCCCTTGCTCACCATTTGTCCTCCATTATTTTTTTG                                                        |
|                          | mpn534h:Ch (Down-F)                            | GTGGCAGGGCGGGCGTAAAAATGATTACATCTATCTTTGG                                                         |
|                          | mpn534h (Down-R)                               | CTTGGAAATTAATCCTTGCC                                                                             |
|                          | orf192.1 (Up-F)                                | GGTTGTTTGAATTTGATACC                                                                             |
|                          | orf192.1:Ch (Up-R)                             | CTCGCCCTTGCTCACCATATTTTTAAAATAACGGCGTT                                                           |
|                          | orf192.1:Ch (Down-F)                           | GTGGCAGGGCGGGCGTAACTATGTATTCTACTTTAAGAC                                                          |
|                          | orf192.1 (Down-R)                              | CTCCTAATTTATCTGTTTCG                                                                             |
|                          | mg428(Up-F)                                    | GGTGGTATTTCACTTGATTG                                                                             |
|                          | mg427:Ch (Up-R)                                | TCCTCGCCCTTGCTCACCATGTGGACTAAAGTAACGCTAA                                                         |
|                          | mg427:Ch (Down-F)                              | GTGGCAGGGCGGGCGTAAAACTTATTA AAAAGCGAAAAATACCTG                                                   |
|                          | mg427 (Down-R)                                 | TTTCTCAATAGGTAGCAATG                                                                             |
|                          | COMmg428-F P438                                | AGTGGGCCCTAGTATTTAGAATTAATAAAGTATGAAAAATAATATTAGTGATGTAAAGTTG<br>GG                              |
|                          | mg428:Ch (Up-R)                                | TCCTCGCCCTTGCTCACCATATATCCATATCTTTCTGTTAGC                                                       |
|                          | YFP-R                                          | AGTCTCGAGTTACTTGTACAGCTCGTCC                                                                     |
|                          | Cherry-F                                       | ATGGTGAGCAAGGGCGAGGA                                                                             |
| Cherry-R                 | CTACTTGTACAGCTCGTCCA                           |                                                                                                  |
| Cherry:cat-F             | TGGACGAGCTGTACAAGTAGAATTGTAGTATTTAGAATTAATAAAG |                                                                                                  |
| cat-R                    | TTACGCCCGCCCTGCCAC                             |                                                                                                  |
| Primer Extension         | PEmg285                                        | [ 6 - FAM ] TAGTAAGGTGAATTTGAGCC                                                                 |
|                          | PEmg412                                        | [ 6 - FAM ] CTGATTCCAGCATTTGA                                                                    |
|                          | PEncRNA-1                                      | [ 6 - FAM ] AGGGAAGTTTCAGTGTCC                                                                   |
|                          | PEncRNA-2                                      | [ 6 - FAM ] CTTCCTTTTGAGATCTTGTTT                                                                |
|                          | PEncRNA-3/4                                    | [ 6 - FAM ] GCCTATGGGTTAACAAAGAGATG                                                              |
| Sanger sequencing        | TetUp                                          | TTCTTGCATCAACATGAG                                                                               |
|                          | TetDown                                        | GTCGTCCAAATAGTCCGA                                                                               |
|                          | CmUp                                           | CAACGGTGGTATATCCAG                                                                               |
|                          | CmDown                                         | CAGTACTGCGATGAGTGGCA                                                                             |
|                          | PacUp                                          | GTAGCTAATCTAACAGTAGG                                                                             |
|                          | PacDown                                        | GTCCTAGAACTTGGTGTATG                                                                             |
| Transconjugant screening | SCRmg428-F                                     | CACTGATAATCGAATAGCTG                                                                             |
|                          | SCRmg428-R                                     | AGTTGAAGATGGCAAAACAG                                                                             |
|                          | mg281-F                                        | CTAGAGTTTAAAGTTTAAACCCC                                                                          |
|                          | mg281-R                                        | CGATTCCGATTAFACTCGCTCC                                                                           |
|                          | SCRpac-F                                       | CTGGAGAGAACCAGGATCA                                                                              |
| SCRpac-R                 | CATATCCACTCTCTAAATTG                           |                                                                                                  |
