# Supplementary figures and images for: Activation of σ20-dependent recombination and horizontal gene transfer in Mycoplasma genitalium
Source: PubMed Central journal article supplement — DNA Res. 2018 Apr 11;25(4):383–93. doi: 10.1093/dnares/dsy011 (PMC6105099; doi:10.1093/dnares/dsy011), 2018-04-11

RriA:Ch  
 $\Delta$ MG\_428

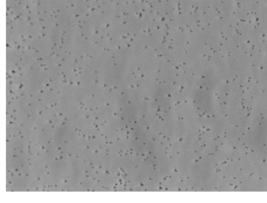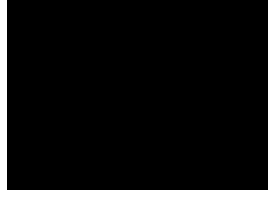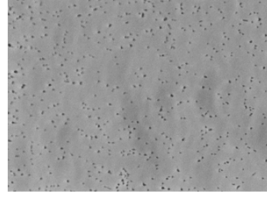

RriA:Ch  
 $\Delta$ MG\_428+Tno<sup>20</sup>

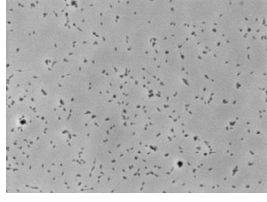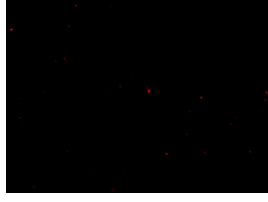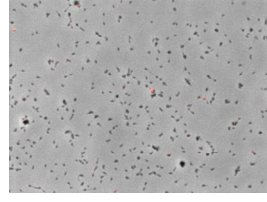

MG\_427:Ch

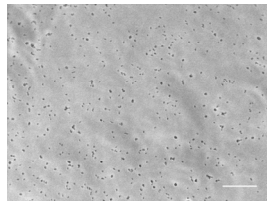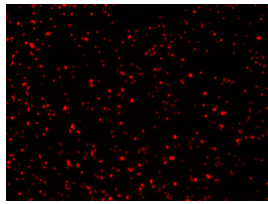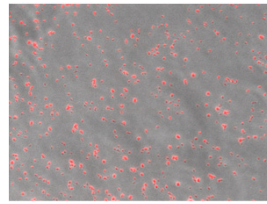

Supplement: dsy011_supp_figure_s3.pdf [file dsy011_supp_figure_s3.pdf]

RecA:Ch  
Tnq<sup>20</sup>:YFP Tnrrr1A

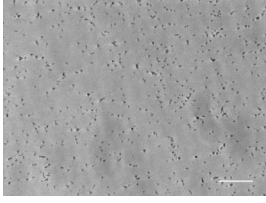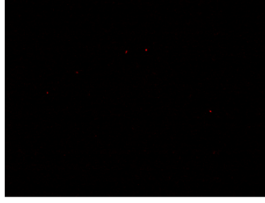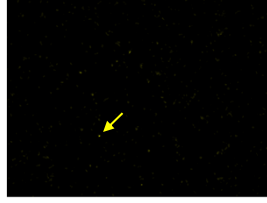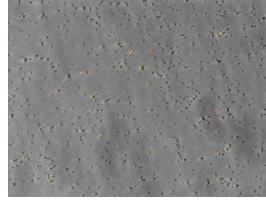

RecA:Ch  
Tnq<sup>20</sup>:YFP Tnrrr1B

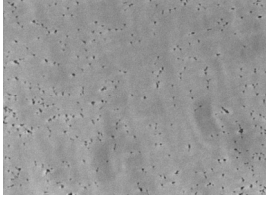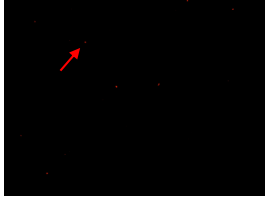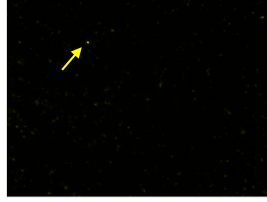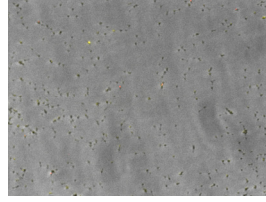

Supplement: dsy011_supp_figure_s5.pdf [file dsy011_supp_figure_s5.pdf]

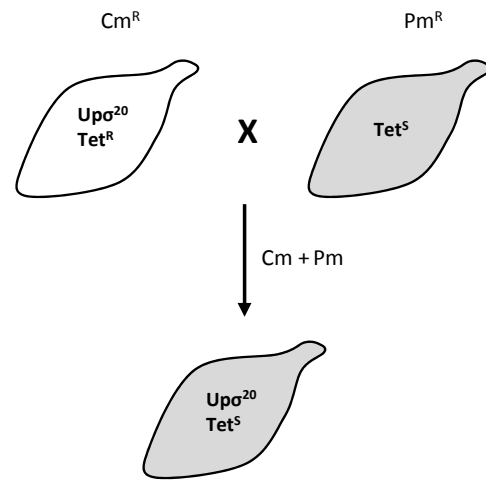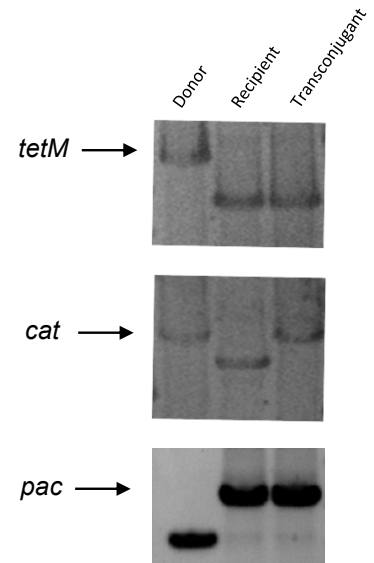

Supplement: dsy011_supp_figure_s6.pdf [file dsy011_supp_figure_s6.pdf]
